# Supplementary material
Source: PubMed Central journal article supplement (PMC5834710)
Supplement: pnas.201719012SI.pdf [file pnas.201719012SI.pdf]

# Supporting Information

Wong et al. 10.1073/pnas.1719012115

## SI Methods

**Mouse Lines.** The conditional RIM1/2 × ELKS1/2 quadruple homozygous KO mice were previously characterized (1) and were generated by crossing conditional RIM1 (2) (RRID:IMSR\_JAX:015832), RIM2 (3) (RRID:IMSR\_JAX:015833), ELKS1 (4) (RRID:IMSR\_JAX:015830), and ELKS2 (5) (RRID:IMSR\_JAX:015831)-KO mice. The constitutive Liprin- $\alpha$ 3-KO mice were generated as described here later. All animal experiments were performed according to institutional regulations at Harvard University.

**Generation of Liprin- $\alpha$ 3-KO Mice.** Liprin- $\alpha$ 3-KO mice were generated for this study by CRISPR/Cas9 gene editing in one-cell zygotes (6). We first identified several 20-bp-long potential targeting sequences followed by PAM sequences in multiple exons of the *Ppfia3* gene, which encodes Liprin- $\alpha$ 3, and tested their efficiency in mouse 3T3 cells by using transfection followed by surveyor assays. We selected a targeting sequence in exon 18 based on its efficiency in disrupting the Liprin- $\alpha$ 3 gene in cultured cells. Cas9 mRNA, single guide RNA (sgRNA), and donor oligos were then prepared for zygote injections. The bicistronic expression vector expressing Cas9 and an sgRNA (pX330-U6-Chimeric\_BB-CBh-hSpCas9) was obtained from Addgene (plasmid no. 42230). Targeting oligos for exon 18 of the mouse *Ppfia3* gene encoding Liprin- $\alpha$ 3 (5'-CACCGAAGAGCATCAAGTCGTCCAT-3' and 5'-AAACATGGACGACTTGATGCTCTC-3') were annealed, phosphorylated, and ligated into the linearized pX330 vector. PCR amplification was performed to add a T7 promoter to the Cas9 coding region with primers 5'-TAATACGACTCACTATAGGGagaATGTACCCATACGATGTTCC-3' and 5'-GCGAGCTCTAGGAATTCTTAC-3'. The T7 promoter was added to the sgRNA by using PCR with primers 5'-TAATACGACTCACTATAGGAAGAGCATCAAGTCGTCCAT-3' and 5'-AAAAGCACCGACTCGGTGCC-3'. T7-Cas9 and T7-sgRNA PCR products were gel-purified and used as the template for in vitro transcription by using the mMES-SAGE mMACHINE T7 ULTRA kit (Life Technologies) and the MEGashortscript T7 kit (Life Technologies), respectively. Cas9 mRNA and sgRNAs were purified by using the MEGAclean kit (Life Technologies), eluted with nuclease-free water, and size-validated by denaturing agarose gel and urea Tris-boric acid-EDTA polyacrylamide gel electrophoresis, respectively. Cas9 mRNAs (5 ng/ $\mu$ L) and sgRNA (2.5 ng/ $\mu$ L) and a donor oligo (10 ng/ $\mu$ L) were freshly mixed in nuclease-free water and injected directly into the pronucleus of one-cell zygotes of FVB/NCrl mice. Injections were carried out in the Brigham & Women's Hospital Transgenic Mouse Core Facility at Harvard Medical School. The zygotes were immediately transplanted into foster mothers. The offspring of the zygote injections were genotyped by a PCR-based Surveyor assay (Transgenomic) with primers 5'-TGCCCGTCTTGAGAGGATGG-3' and 5'-AAAGAGAATCCTGGGACAGC-3' to screen for founder lines that carry insertions or deletions (indels) at the targeting locus. We identified three founders in 142 offspring by PCR and Surveyor assay. Exon 18 of indel-carrying founders was amplified by PCR, subcloned, and sequenced to identify specific mutations. In each founder, we cloned PCR fragments of the targeted gene locus and sequenced them. We detected as many as three different alleles in each founder, suggesting that gene editing continued to occur beyond the single-cell stage. A frame-shift mutation deleting 8 bp was selected, removal of Liprin- $\alpha$ 3 was confirmed by Western blot, and the allele was then outbred to 129S2/SvPasCrl mice for five generations and maintained as heterozygous line. The mice were

genotyped by using oligos 5'-GATCTTCAAGCCAGTTCTGC-3' and 5'-AGAGCCGGCCTATGGACGAC-3' for the WT allele (resulting in a 365-bp band) and oligos 5'-GATCTTCAAGCCAGTTCTGC-3' and 5'-GAGCCGGCCTATGGACGAC-3' for the mutant allele (resulting in a 356-bp band). All experiments were performed on littermate pairs of WT Liprin- $\alpha$ 3<sup>+/+</sup> and Liprin- $\alpha$ 3<sup>-/-</sup> mice.

**Cell Cultures and Lentiviral Infection.** Primary mouse hippocampal cultures were generated from newborns within 48 h after birth as previously described (1, 4). Unless otherwise stated, neurons were plated on 0.15-mm-thick chemically stripped glass coverslips. Neurons from conditional RIM1/2 × ELKS1/2 quadruple homozygous floxed mice were infected at 5 DIV with viruses expressing a cre recombinase (to generate cKO<sup>R+E</sup> neurons) or an inactive cre truncation mutant (to generate control<sup>R+E</sup> neurons) under the human synapsin promoter (1). Lentiviruses were generated in HEK293T cells by Ca<sup>2+</sup> phosphate transfection. HEK cell supernatants containing cre-expressing and control viruses were collected 2 d after transfection and applied to cultures at 5 DIV. Liprin- $\alpha$ 3<sup>-/-</sup> and Liprin- $\alpha$ 3<sup>+/+</sup> cultures were generated from littermates of heterozygote breeding pairs that were genotyped before culturing. For sypHy imaging, a sypHyA4-expressing lentivirus (1, 7) and an SV2-tdTomato-expressing lentivirus were applied to cultures at DIV 3. Lentiviruses expressing a synapsin promoter-driven, N-terminally HA-tagged rat Liprin- $\alpha$ 3 were applied to cultures at DIV 1 (Fig. 3 and Figs. S4 and S5) or at DIV 5 (Fig. S6) for rescue experiments.

**Western Blotting.** Fluorescent Western blotting was used for quantitative protein-expression analyses in hippocampal lysates. Hippocampi were collected from 3–4-wk-old littermate Liprin- $\alpha$ 3<sup>+/+</sup> and Liprin- $\alpha$ 3<sup>-/-</sup> mice, flash-frozen, and homogenized by using a motorized glass-Teflon homogenizer in a buffer containing 150 mM NaCl, 25 mM Hepes, pH 7.5, 4 mM EDTA, 1 mM DTT, 1 mM PMSF, 1  $\mu$ g/mL Leupeptin, Pepstatin, 2  $\mu$ g/mL Aprotinin, and 1 $\times$  PhosStop (Roche), and extracted in 1% Triton for 1 h at 4 °C. Protein concentration was measured by a bicinchoninic acid assay. Protein (20  $\mu$ g per sample) was run on SDS/PAGE gels and transferred onto nitrocellulose membranes. Blots were washed with Tris-buffered saline (TBS) solution, blocked in TBS solution containing 5% milk, 5% goat serum, and then incubated with primary antibodies overnight at 4 °C in TBS solution containing 5% BSA and 0.1% Tween-20. Fluorescent secondary antibody incubation was done for 1 h at room temperature. Membranes were washed in TBS solution and air-dried before imaging. Membranes were scanned by using a LICOR Odyssey Fluorescent Scanner, and quantification was done by using ImageJ on the original 16-bit images. The fluorescent signal of the test protein band was normalized to a  $\beta$ -actin loading control that was run in the same lane, and protein levels were expressed normalized to the average of the three WT control samples. For display of fluorescent Western blots, the 16-bit images were converted to 8-bit images, which resulted in limited loss of background information in image areas with very low background, but reflects the overall relationship between background and signal well. All analyses were done in at least three independent littermate pairs.

For nonquantitative assessment of rescue construct expression in cultured hippocampal neurons, chemiluminescent Western blotting was used to detect Liprin- $\alpha$ 3. Cultured neurons from one coverslip were harvested in 25  $\mu$ L 1 $\times$  SDS sample buffer and run on 7.5% SDS gels followed by transfer to nitrocellulose membranes. Membranes were blocked in TBS solution containing 10% nonfat milk with 5% goat serum and 0.1% Tween-20 for 1 h at room temperature.

Membranes were incubated overnight at 4 °C in primary antibodies in TBS solution with 5% nonfat milk, 2.5% goat serum, and 0.1% Tween-20. Membranes were incubated with HRP-conjugated secondary antibodies (1:10,000) at room temperature for 2 h. Membranes were sprayed with a chemiluminescent reagent and exposed to film.

Primary antibodies used for Western blotting were as follows: rabbit anti-Liprin- $\alpha$ 3-1 (1:1,000; RRID: AB\_887762), rabbit anti-Liprin- $\alpha$ 3-2 (1:200; gift from S. Schoch, Institute for Neuropathology, University of Bonn, Bonn, Germany; described in ref. 8), rabbit anti-Liprin- $\alpha$ 3-3 (serum 4396, 1:5,000; described in ref. 9; gift from T. Südhof, Department of Molecular and Cellular Physiology and HHMI, Stanford University, Stanford, CA; RRID: AB\_2617056), rabbit anti-Liprin- $\alpha$ 1 (1:200; described in ref. 8; gift from S. Schoch), rabbit anti-Liprin- $\alpha$ 1 (1:200; described in ref. 8; gift from S. Schoch), rabbit anti-Liprin- $\alpha$ 2 (1:200; described in ref. 8; gift from S. Schoch); rabbit anti-Liprin- $\alpha$ 4 (1:200; described in ref. 8; gift from S. Schoch), mouse anti-LAR (1:100; RRID: AB\_10672300), mouse anti-PSD-95 (1:500; RRID: AB\_10698024), mouse anti- $\beta$ -actin (1:2,000; RRID: AB\_476692), mouse anti-GIT-1 (1:500; RRID: AB\_10672300), mouse anti-ELKS1/2 $\alpha$  (1:1,000; RRID: AB\_869944), rabbit anti-RIM1 (1:2,000; RRID: AB\_2617051; gift from T. Südhof), rabbit anti-RIM1 (1:1,000; RRID: AB\_887774), rabbit anti-RIM-BP2 (1:500; RRID: AB\_2619739), mouse anti-panMunc13 (1:100; RRID: AB\_398312), rabbit anti-Munc18-1 (1:1,000; gift from T. Südhof), mouse anti-Synapsin (1:4,000; RRID: AB\_2617071), rabbit anti-Synaptobrevin-2 (1:4,000; gift from T. Südhof), rabbit anti-SNAP-25 (1:2,000; gift from T. Südhof), mouse anti-Syntaxin1 (1:500; RRID: AB\_528484), mouse anti-Synaptophysin (1:5,000; RRID: AB\_887824), and mouse anti-Synaptotagmin1 (1:500; RRID: AB\_2199314). IRDye 800CW-conjugated or IRDye 680RD-conjugated anti-mouse IgG (RRIDs: AB\_621847 or AB\_621848) or anti-rabbit IgG (RRID: AB\_10953628 or AB\_10954442) secondary antibodies were used at 1:10,000.

**Immunofluorescent Staining of Cultured Neurons.** DIV 14–17 neuronal cultures grown on 0.15-mm-thick chemically stripped glass coverslips were washed with PBS solution and fixed in 4% paraformaldehyde (PFA) in PBS solution at room temperature for 10 min. After three rinses in PBS solution, the neurons were blocked and permeabilized in 3% BSA/0.1% Triton X-100/PBS solution for 1 h, incubated in primary antibodies (in blocking solution) at 4 °C for 24–48 h, washed three times in PBS solution, and incubated in Oregon green 488, Alexa 555, and Alexa 633 secondary antibodies (1:200) at 4 °C for 24–48 h. Coverslips were air-dried at room temperature, mounted onto glass slides in mounting medium, and stored at 4 °C until imaging.

Primary antibodies used were as follows: monoclonal mouse anti-Bassoon<sup>N</sup> (1:1,000; RRID: AB\_11181058), monoclonal guinea pig anti-Bassoon<sup>C</sup> (1:500; RRID: AB\_2290619), rabbit anti-Liprin- $\alpha$ 3 (serum 4396, 1:5,000; described in ref. 9; gift from T. Südhof), rabbit anti-Liprin- $\alpha$ 2 [1:250; gift from S. Schoch (8)], anti-ELKS2 $\alpha$  [serum E3-1029, 1:1,000; custom made (10)], rabbit anti-RIM1 (1:1,000; AB\_887774), monoclonal mouse anti-PSD-95 (1:200; RRID: AB\_10698024), guinea pig anti-vGlut1 (1:500; AB\_887878), rabbit anti-Synapsin 1 (serum E028, 1:1,000; gift from T. Südhof), rabbit anti-RIM-BP2 (1:500; RRID: AB\_2619739), and rabbit anti-Munc13-1 (1:200; RRID: AB\_887735).

**Confocal and STED Imaging and Analysis.** Confocal and STED images were acquired with a Leica SP8 Confocal/STED 3 $\times$  microscope with an oil-immersion 100 $\times$ , 1.44-N.A. objective at the Harvard Neuro-Discovery Center Enhanced Imaging Core. Synapse-rich areas (23.3  $\times$  23.3  $\mu$ m<sup>2</sup>) were selected as regions of interest (ROIs) and were scanned at a sampling frequency of  $\sim$ 10 nm per pixel. Triple-color sequential confocal scans were followed by dual-color sequential STED scans by using a STED microscope with gated detectors and 40 nm  $x/y$  resolution and a 70-nm full width at half maximum

measured with 40-nm beads. Alexa 633, Alexa Fluor 555, and Oregon green 488 were excited with 633-nm, 555-nm, and 488-nm white light lasers, respectively, at 2–5% of 1.5 mW laser power in this particular order. During STED scanning, Oregon green 488 and Alexa Fluor 555 signals were depleted with 592 nm (75% of maximum power) and 660 nm (25% of maximum power) time-gated depletion lasers. Four-times line accumulation and three-times frame averaging were applied during STED scanning. Identical settings were applied to all samples within an experiment. Images were analyzed in ImageJ with background subtraction by using a rolling ball of 0.5  $\mu$ m (11). For all quantitative line-scan analyses of STED images, synapses in side view were defined as synapses that contained a synaptic vesicle cluster with an elongated Bassoon structure along the edge of the vesicle cluster. For line profile analysis, a 1- $\mu$ m-long, 250-nm-wide profile was selected perpendicular to the elongated Bassoon structure across its center. An intensity profile was obtained for the synaptic vesicle cluster (imaged with confocal microscopy), the Bassoon staining (imaged by STED), and the test protein (imaged by STED). The axial position of a test protein was the  $x$  coordinate relative to the Bassoon maximum at which the fluorescent intensity was at maximum. A custom MATLAB program was used to analyze the distribution of the synaptic protein clusters, and all synapses were included in this analysis. In each ROI (defined as the outline of the vGluT1 vesicle cluster), Bassoon and test protein clusters (500 nm<sup>2</sup> < size of the detected cluster < 0.4  $\mu$ m<sup>2</sup>) were identified within the mask of the vesicle marker vGluT1. Active zone-associated components were identified as test protein clusters with  $\geq$ 10% overlap with Bassoon clusters. All other synaptic protein clusters (<10% overlap with Bassoon but >10% overlap with the vesicle marker vGluT1) were classified as non-active zone-associated synaptic components. The distribution of synaptic components was calculated from individual ROIs. Protein levels in STED or confocal images were measured as the mean fluorescent intensity within an ROI. Representative images were contrast-adjusted, but all quantitative analyses were performed on original images without adjustments and were done identically for all experimental conditions. For all image acquisition and analyses comparing two or more conditions, the experimenter was blind to the condition.

**Histological Analyses of Brain Sections.** For histological analyses of brain sections, brains from 2–3-wk-old mice were perfusion-fixed in 0.1 M Sorensen's phosphate buffer containing 4% PFA. Cryoprotection was done in 30% sucrose overnight, and the brains were frozen in O.C.T. (Sakura Finetek) and sagittally sectioned at 40  $\mu$ m in a cryostat. Brain slices mounted on glass slides were stained with 0.1% cresyl violet (Sigma Aldrich) following standard protocols, and immunostainings were performed as described for cultured cells. Slices were imaged with a slide scanner (VS120; Olympus) at the Neurobiology Imaging Facility of Harvard Medical School.

**Force-Plate Analysis.** Locomotor activity was assessed on two force-plate actometers (40 cm  $\times$  40 cm) as previously described (5, 12, 13). In each experiment, the center of force of a mouse was monitored for 30 min as it explored, for the first time, the open arena of the actometer in a well-lit room. Liprin- $\alpha$ 3<sup>+/+</sup> and Liprin- $\alpha$ 3<sup>-/-</sup> littermate mice (12 to 16 wk old) were run on the same day. The trajectory of the center of force was analyzed in three 10-min bins. The spatial confinement index and low-mobility bouts were calculated as described previously (12). Low-mobility bouts were defined as periods during which the center of force was confined to a circle of 15-mm radius for more than 10 s. For all behavioral analyses, the experimenter was blind to the genotype.

**Electrophysiology.** Electrophysiological recordings in cultured hippocampal neurons were performed as previously described (10). The extracellular solution contained (in mM): 140 NaCl, 5 KCl, 2 CaCl<sub>2</sub>, 2 MgCl<sub>2</sub>, 10 Hepes-NaOH, pH 7.4, 10 glucose ( $\sim$ 310 mOsm), 1  $\mu$ M tetrodotoxin to block action potentials,

100  $\mu\text{M}$  picrotoxin to block GABA receptors, and 50  $\mu\text{M}$  D-(–)-2-Amino-5-phosphonopentanoic acid (AP5) to block NMDA receptors. All recordings were performed in whole-cell patch-clamp configuration at 20–23 °C at DIV 14–17. Whole-cell glass pipettes were pulled at 2–4 M $\Omega$  and filled with intracellular solution containing (in mM): 120 Cs-methanesulfonate, 10 EGTA, 2 MgCl<sub>2</sub>, 10 Hepes-CsOH (pH 7.4), 4 Na<sub>2</sub>-ATP, 1 Na-GTP, and 4 N-(2,6-dimethylphenylcarbamoylmethyl)triethylammonium chloride (~300 mOsm). Cells were held at –70 mV, and access resistance was monitored between sweeps. Cells in which access resistance exceeded 20 M $\Omega$  or in which the holding current exceeded –200 pA were excluded from the analysis. mEPSC data were acquired with an Axon 700B MultiClamp amplifier, digitized with a Digidata 1440A digitizer at 10 kHz, and analyzed by using a template search with visual inspection of each event in pClamp.

For recordings in acute hippocampal slices, 3–4-wk-old mice were deeply anesthetized by isoflurane and decapitated. Sagittal brain slices containing hippocampus (300- $\mu\text{m}$  thick) were cut by using a vibratome (VT1200s; Leica) in ice-cold cutting solution containing (in mM): 75 NaCl, 2.5 KCl, 7.5 MgSO<sub>4</sub>, 75 sucrose, 1 NaH<sub>2</sub>PO<sub>4</sub>, 12 glucose, 26.2 NaHCO<sub>3</sub>, 1 Myo-inositol, 3 pyruvic acid, and 1 ascorbic acid. After cutting, slices were incubated at room temperature in incubation solution containing (in mM): 126 NaCl, 2.5 KCl, 2 CaCl<sub>2</sub>, 1.3 MgSO<sub>4</sub>, 1 NaH<sub>2</sub>PO<sub>4</sub>, 12 glucose, 26.2 NaHCO<sub>3</sub>, 1 Myo-inositol, 3 pyruvic acid, and 1 ascorbic acid for at least 1 h before use. For the field recordings, slices were placed in a recording chamber continuously perfused with artificial cerebrospinal fluid (ACSF) containing (in mM): 126 NaCl, 2.5 KCl, 2 CaCl<sub>2</sub>, 1.3 MgSO<sub>4</sub>, 1 NaH<sub>2</sub>PO<sub>4</sub>, 12 glucose, and 26.2 NaHCO<sub>3</sub> at 2.5–3 mL/min (heated to 30–32 °C). All solutions were constantly bubbled with 95% O<sub>2</sub> and 5% CO<sub>2</sub>. All recordings were completed within 4 h of slicing. For recording field excitatory postsynaptic potentials (EPSPs), 50  $\mu\text{M}$  picrotoxin and 50  $\mu\text{M}$  AP5 were added. The recording electrode was filled with ACSF with a tip resistance of 3–4 M $\Omega$  and placed ~20  $\mu\text{m}$  below the slice surface in the stratum radiatum of area CA1. A concentric stimulation electrode was used for electrical stimulation and was placed 500–600  $\mu\text{m}$  away from the recording site in the Schaffer collateral pathway. Bipolar stimuli (0.5 ms total) were applied to the slice every 5 s. The stimulation intensity was gradually increased from 25 to 500  $\mu\text{A}$  with steps of 25  $\mu\text{A}$ . Each stimulation intensity was repeated five times, and the average response was used for quantification. Data were acquired with an Axon 700B MultiClamp amplifier, digitized with a Digidata 1440A digitizer, and analyzed using pClamp.

Data acquisition and analyses for electrophysiological experiments in cultured neurons and acute slices were done by an experimenter blind to the genotype.

**SypHy Imaging.** SypHy and SV2-tdTomato were expressed from lentiviruses in hippocampal cultures, and cultures were imaged at DIV 14–17 and quantified as previously described (1). Briefly, experiments were performed in extracellular solution containing (in mM): 140 NaCl, 5 KCl, 2 CaCl<sub>2</sub>, 2 MgCl<sub>2</sub>, 10 glucose, 10 Hepes-NaOH, 0.05 AP5, and 0.025 6-cyano-7-nitroquinoxaline-2,3-dione (pH 7.4, ~310 mOsm) at 20–23 °C and imaged with an upright microscope. Images were acquired with a 60 $\times$ , 1.0-N.A. water-immersion objective at 0.5 Hz with 2  $\times$  2 binning. Neurons were stimulated at 20 Hz with a focal Nichrome bipolar electrode. NH<sub>4</sub>Cl solution (extracellular solution substituted with NH<sub>4</sub>Cl for

50 mM NaCl, adjusted to pH 7.4) was applied at the end of each experiment to visualize all sypHy puncta. Images were analyzed in ImageJ with background subtraction by using a rolling ball of 5  $\mu\text{m}$  (11). NH<sub>4</sub>Cl-responsive puncta for which  $\%(\Delta F_{\text{NH}_4\text{Cl}}/F_0) > 200\%$  were included in the analysis and were used to define ROIs. Puncta that responded to action potential stimulation [40 or 200 action potentials at 20 Hz,  $\%(\Delta F_{\text{during stimulation}}/\Delta F_{\text{NH}_4\text{Cl}}) > 0\%$ , where  $\Delta F_{\text{during stimulation}}$  is defined as the mean fluorescence of  $F - F_0$  during stimulation] were defined as active synapses. SypHy  $F_0$  was defined as the mean fluorescence during 5 s before stimulation. SypHy  $\Delta F$  was quantified as fluorescence intensity  $F$  at each time point minus  $F_0$ . Peak fluorescence ( $\Delta F_{\text{peak}}$ ) is defined as the average  $\Delta F$  during the first four imaging frames immediately following the end of the stimulation. Data were normalized to the total pool as defined by sypHy response to NH<sub>4</sub>Cl application ( $\Delta F_{\text{NH}_4\text{Cl}}$ ). All experiments and analyses were performed by an experimenter blind to the genotype.

**Transmission EM.** For glutaraldehyde fixation, DIV 14 neuronal cultures were fixed with 2% glutaraldehyde in 0.1 M sodium cacodylate buffer at 37 °C for 7.5 min, and were processed in the Conventional Electron Microscopy Facility at Harvard Medical School. Sample preparation was performed as described in ref. 1.

For high-pressure freezing, DIV-14 neuronal cultures plated on 6-mm-diameter, 0.12-mm-thick carbon-coated sapphire coverslips were transferred to extracellular solution containing (in mM) 140 NaCl, 5 KCl, 2 CaCl<sub>2</sub>, 2 MgCl<sub>2</sub>, 10 glucose, 10 Hepes-NaOH, pH 7.4, ~310 mOsm, and were frozen with a Leica EM ICE high-pressure freezer. Frozen samples were freeze substituted (in acetone containing 1% osmium tetroxide, 1% glutaraldehyde, and 1% H<sub>2</sub>O), embedded in Epon, and sectioned at 50 nm by the Conventional Electron Microscopy Facility at Harvard Medical School. All samples were imaged by using a JEOL 1200EX transmission electron microscope with an AMT 2k CCD camera. All images were quantified as described in ref. 1 by using SynapseEM, a MATLAB macro provided by M. Verhage and J. Broeke, Center for Neurogenetics and Cognitive Research, Department of Functional Genomics, Vrije Universiteit Amsterdam, Amsterdam. Docked vesicles were defined as vesicles for which the vesicle membrane touches the presynaptic plasma membrane, and tethered vesicles were defined as vesicles within 100 nm of the active zone. Frequency distributions of the nearest distance of a vesicle to the plasma membrane opposed to the PSD were plotted in 10-nm bins. All experiments were performed by an experimenter blind to the genotype.

**Resource Sharing and Statistics.** Materials, code, and data may be shared with requesting investigators according to NIH Resource Sharing guidelines. Levels of statistical significance were set at  $P \leq 0.05$ ,  $P \leq 0.01$ , and  $P \leq 0.001$ . Student's  $t$  tests were used for pairwise genotype comparisons of means. For multiple comparisons in rescue experiments, one-way ANOVA followed by Holm–Šidák multiple-comparisons tests were used. Two-way ANOVA followed by Holm–Šidák multiple-comparisons tests were used to compare the expression levels and localization parameters of various proteins in STED imaging, in the force plate experiments, and in the electrophysiological field recordings. The number of observations and significance values for each variable of the ANOVAs are given in the figure legend, and significance values of posttests are indicated by star symbols within the figures.

1. Wang SSH, et al. (2016) Fusion competent synaptic vesicles persist upon active zone disruption and loss of vesicle docking. *Neuron* 91:777–791.
2. Kaeser PS, et al. (2008) RIM1alpha and RIM1beta are synthesized from distinct promoters of the RIM1 gene to mediate differential but overlapping synaptic functions. *J Neurosci* 28:13435–13447.
3. Kaeser PS, et al. (2011) RIM proteins tether Ca<sup>2+</sup> channels to presynaptic active zones via a direct PDZ-domain interaction. *Cell* 144:282–295.
4. Liu C, et al. (2014) The active zone protein family ELKS supports Ca<sup>2+</sup> influx at nerve terminals of inhibitory hippocampal neurons. *J Neurosci* 34:12289–12303.

5. Kaeser PS, et al. (2009) ELKS2alpha/CAST deletion selectively increases neurotransmitter release at inhibitory synapses. *Neuron* 64:227–239.
6. Wang H, et al. (2013) One-step generation of mice carrying mutations in multiple genes by CRISPR/Cas-mediated genome engineering. *Cell* 153:910–918.
7. Granseth B, Odermatt B, Royle SJ, Lagnado L (2006) Clathrin-mediated endocytosis is the dominant mechanism of vesicle retrieval at hippocampal synapses. *Neuron* 51:773–786.
8. Zürner M, Mittelstaedt T, tom Dieck S, Becker A, Schoch S (2011) Analyses of the spatiotemporal expression and subcellular localization of Liprin- $\alpha$  proteins. *J Comp Neurol* 519:3019–3039.

9. Schoch S, et al. (2002) RIM1alpha forms a protein scaffold for regulating neurotransmitter release at the active zone. *Nature* 415:321–326.
10. Held RG, Liu C, Kaeser PS (2016) ELKS controls the pool of readily releasable vesicles at excitatory synapses through its N-terminal coiled-coil domains. *eLife* 5:e14862.
11. Sternberg SR (1983) Biomedical image processing. *Computer (Long Beach Calif)* 16: 22–34.
12. Fowler SC, Birkestrand B, Chen R, Vorontsova E, Zarcone T (2003) Behavioral sensitization to amphetamine in rats: Changes in the rhythm of head movements during focused stereotypies. *Psychopharmacology (Berl)* 170:167–177.
13. Fowler SC, et al. (2001) A force-plate actometer for quantitating rodent behaviors: Illustrative data on locomotion, rotation, spatial patterning, stereotypies, and tremor. *J Neurosci Methods* 107:107–124.

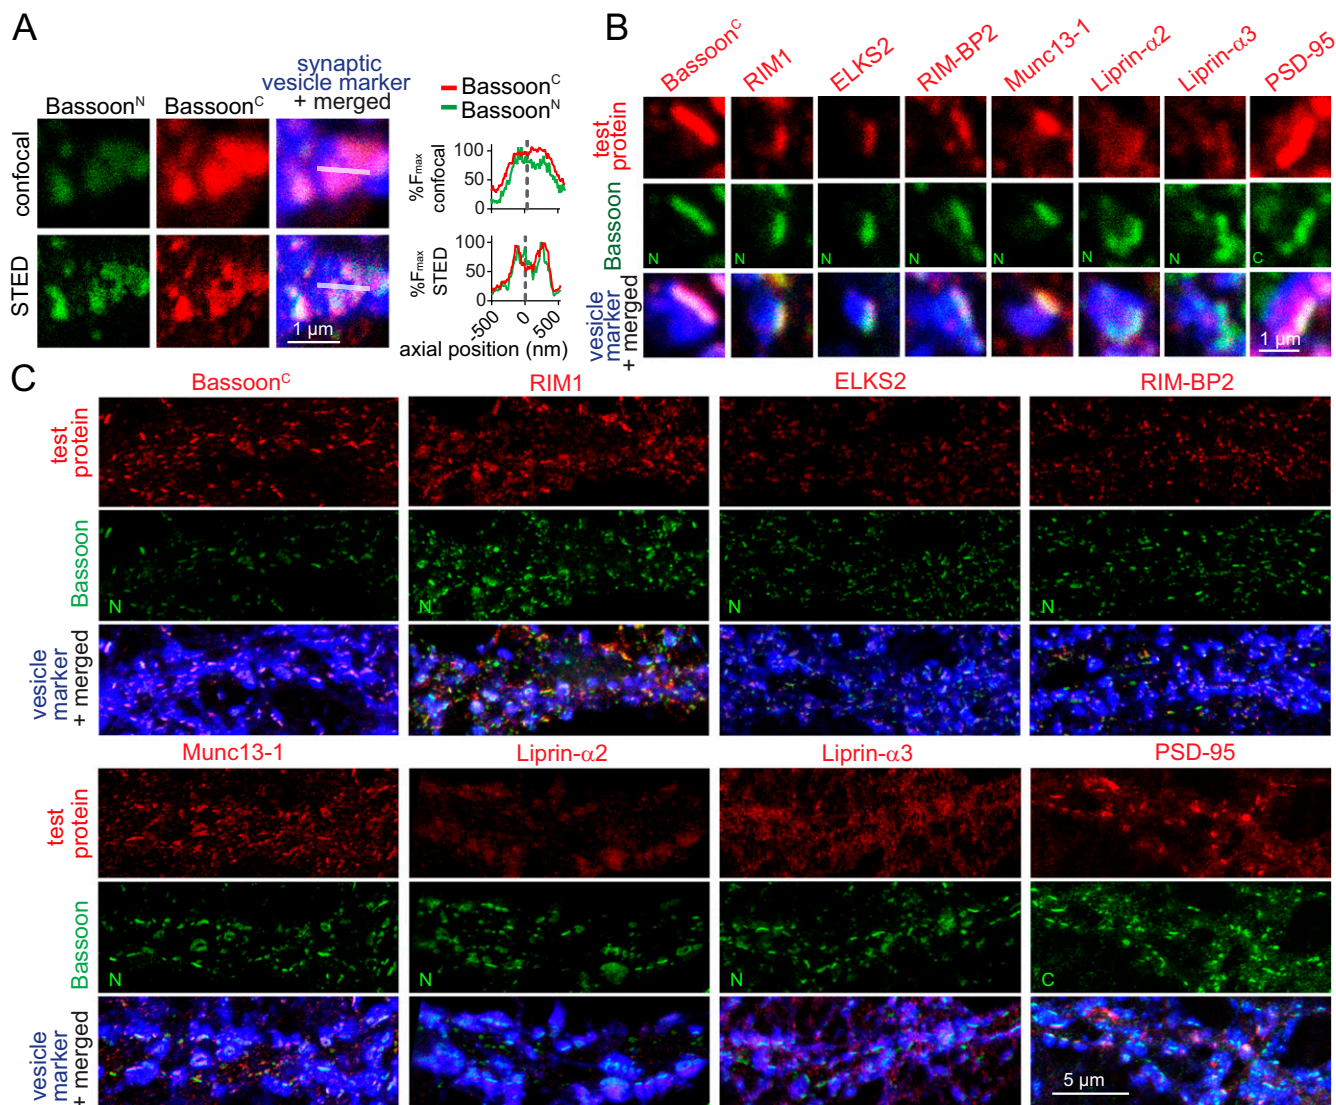

**Fig. S1.** Synapse in face view and additional images for Fig. 1. (A) Example images and line scans of a synapse stained for Bassoon<sup>N</sup> and Bassoon<sup>C</sup> in face view. Confocal scanning shows disk-like Bassoon structures, whereas STED images of the same synapse resolve a distinct doughnut-shaped structure of the Bassoon cluster. Synapsin was used as a marker to label the boundary of presynaptic boutons and was imaged by confocal microscopy. (B) Confocal scans of the STED images shown in Fig. 1C. (C) Overview STED images of cultured hippocampal neurons shown in Fig. 1.





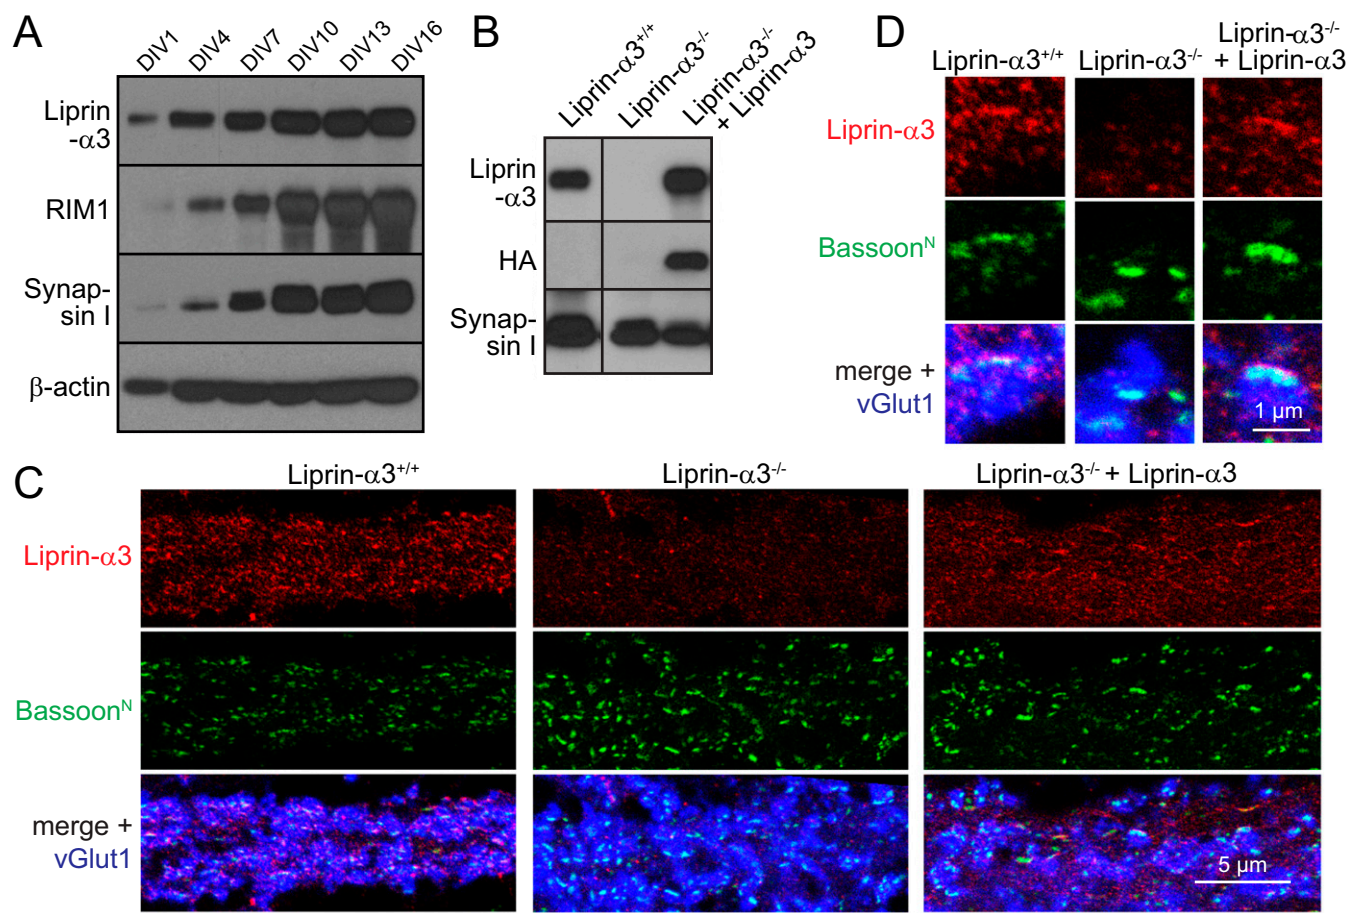

**Fig. 54.** Expression and localization of rescue Liprin- $\alpha$ 3 upon lentiviral transduction at DIV 1. (A) Time course of expression of Liprin- $\alpha$ 3, RIM1, and Synapsin I in cultured hippocampal neurons harvested at indicated DIVs. (B) Liprin- $\alpha$ 3<sup>+/+</sup> neurons, Liprin- $\alpha$ 3<sup>-/-</sup> neurons, and Liprin- $\alpha$ 3<sup>-/-</sup> neurons rescued with lentiviral expression of Liprin- $\alpha$ 3 were used for imaging of synaptic vesicle exocytosis. Western blots show Liprin- $\alpha$ 3 expression in Liprin- $\alpha$ 3<sup>+/+</sup> neurons, Liprin- $\alpha$ 3<sup>-/-</sup> neurons, and Liprin- $\alpha$ 3<sup>-/-</sup> neurons transduced with lentiviral rescue Liprin- $\alpha$ 3 (human synapsin promoter driven, HA-tagged) at DIV 1. Neurons were harvested for Western blotting at DIV 14. All bands for a given antibody are from the same blot displayed with identical contrast and intensity settings. Images were cropped to remove additional irrelevant lanes. (C and D) Representative STED images of hippocampal neurons immunostained with Liprin- $\alpha$ 3 and Bassoon<sup>N</sup> antibodies showing localization of rescue Liprin- $\alpha$ 3 within nerve terminals in overview images (C) and at high magnification (D). vGlut1 antibodies were used to label the synaptic vesicle cluster and the vGlut1 signal was imaged with confocal microscopy.









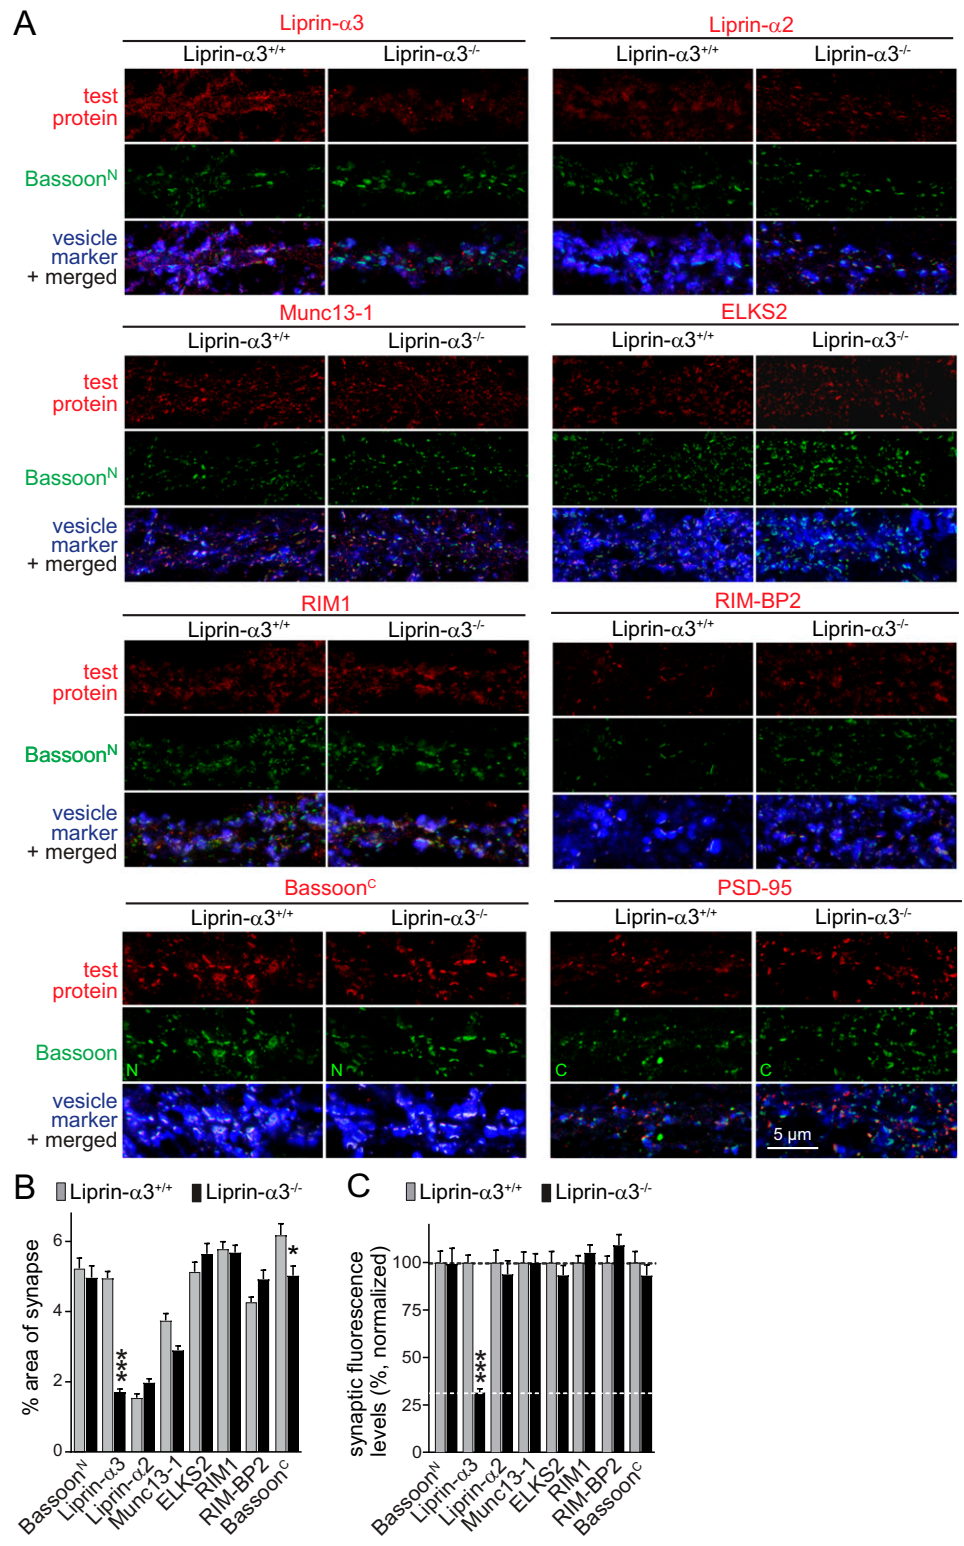

**Fig. 58.** Additional STED microscopy data related to Fig. 5. (A) Overview STED images of the experiment shown in Fig. 5. (B) Analysis of the percentage of the area covered by test proteins within synapses as defined by the vesicular marker vGlut1: Bassoon<sup>N</sup> (<sup>+/+</sup>, *n* = 533 synapses/3 cultures; <sup>-/-</sup>, *n* = 332/3); Liprin-α3 (<sup>+/+</sup>, *n* = 485/3; <sup>-/-</sup>, *n* = 550/3); Liprin-α2 (<sup>+/+</sup>, *n* = 546/3; <sup>-/-</sup>, *n* = 729/3); Munc13-1 (<sup>+/+</sup>, *n* = 599/3; <sup>-/-</sup>, *n* = 666/3); ELKS2 (<sup>+/+</sup>, *n* = 697/3; <sup>-/-</sup>, *n* = 589/3); RIM1 (<sup>+/+</sup>, *n* = 642/3; <sup>-/-</sup>, *n* = 360/3); RIM-BP2 (<sup>+/+</sup>, *n* = 744/3; <sup>-/-</sup>, *n* = 730/3); and Bassoon<sup>C</sup> (<sup>+/+</sup>, *n* = 533/3; <sup>-/-</sup>, *n* = 332/3). Statistical significance was determined by two-way ANOVA (genotype, test protein, and interaction significant at *P* ≤ 0.001) followed by Holm-Šidák posttests for multiple comparisons (reported in figure). (C) Analysis of fluorescence levels integrated over the synapse area normalized to the average of Liprin-α3<sup>+/+</sup> synapses. Numbers of synapses/cultures are as in B. Statistical significance was determined by two-way ANOVA (genotype significant at *P* ≤ 0.01, test protein significant at *P* ≤ 0.001, interaction significant at *P* ≤ 0.001) followed by Holm-Šidák posttests for multiple comparisons (reported in figure). All data are means ± SEM (\**P* ≤ 0.05 and \*\*\**P* ≤ 0.001).

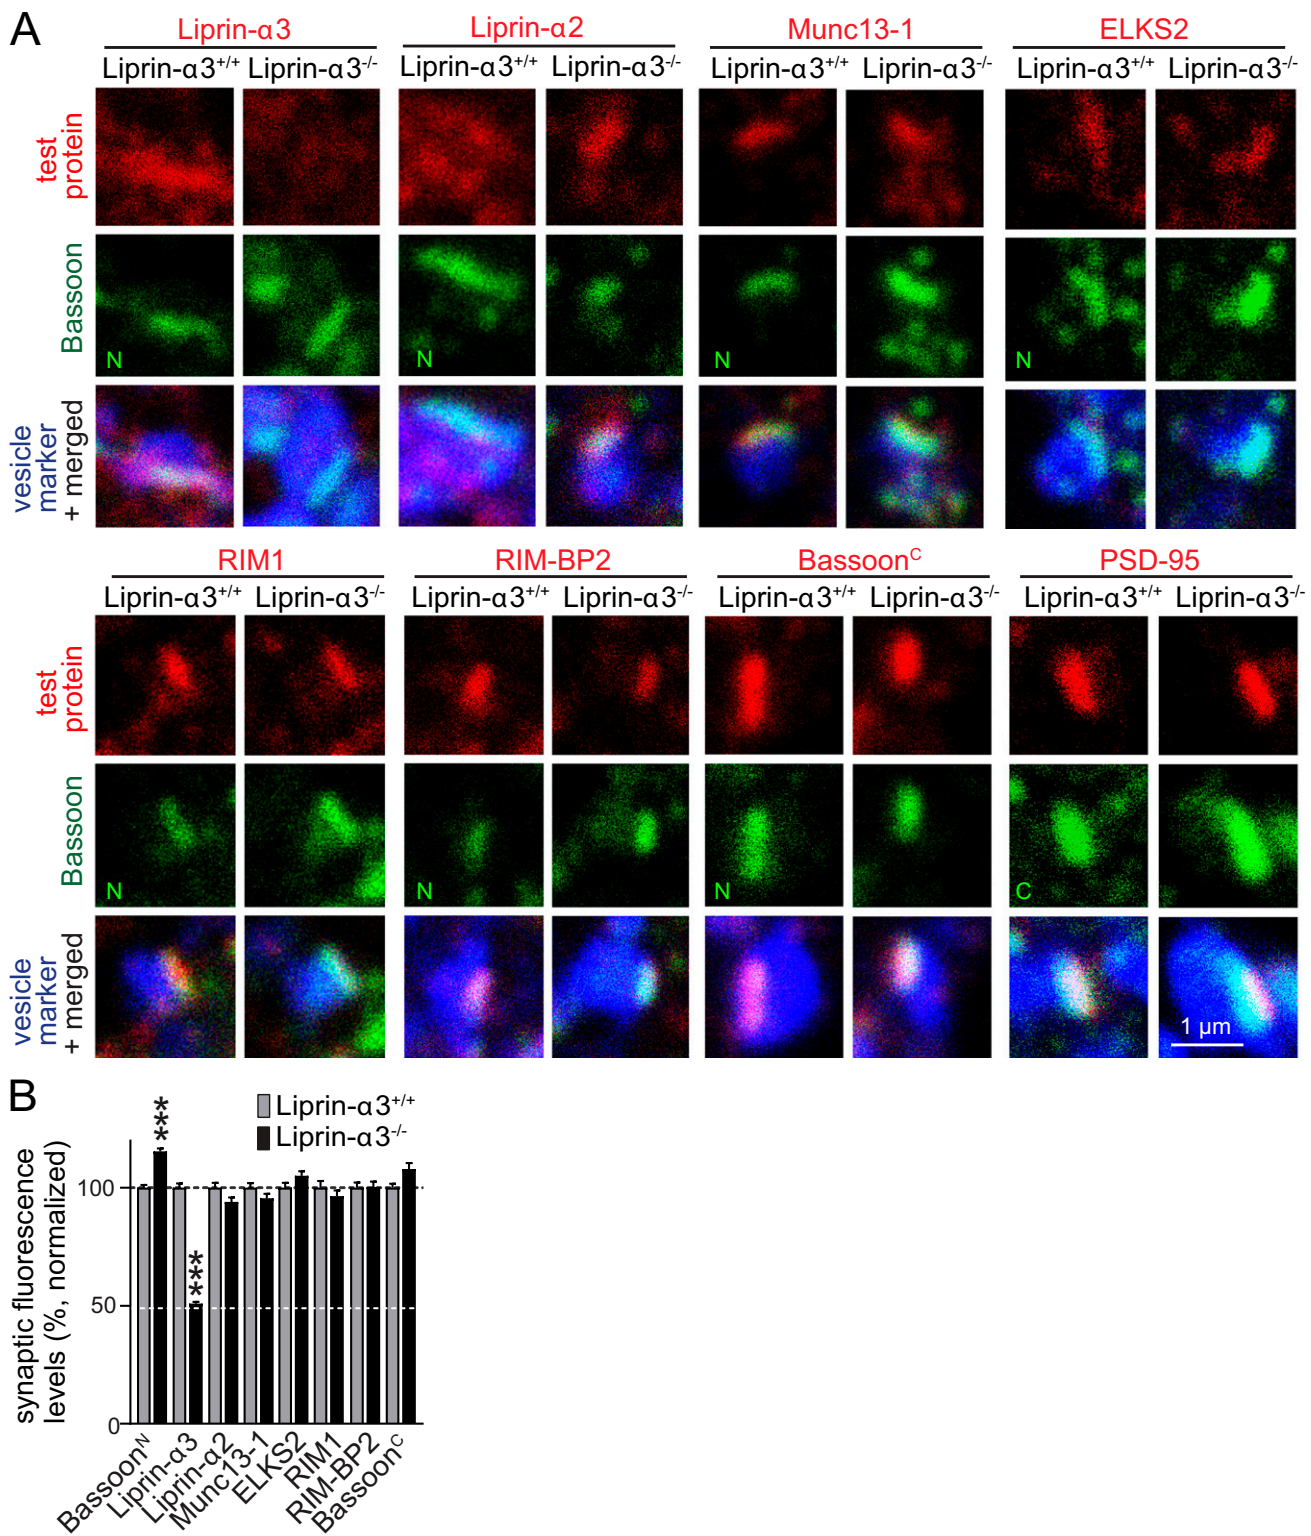

**Fig. 59.** Analysis of synaptic protein levels in confocal images of Liprin- $\alpha$ 3<sup>-/-</sup> synapses. Nonlinearities in the signal intensity may affect protein level measurements in STED images. To circumvent this limitation, we analyzed confocal scans of the experiment shown in Fig. 5 to assess synaptic fluorescence levels. (A) Confocal images of the same synapses that are shown in Fig. 5A. (B) Analyses of synaptic fluorescence in confocal images, plotted as the mean fluorescence levels within the synapse area defined by the vesicle marker normalized to the average of Liprin- $\alpha$ 3<sup>+/+</sup> synapses: Bassoon<sup>N</sup> (<sup>+/+</sup>,  $n = 3,150$  synapses/8 cultures; <sup>-/-</sup>,  $n = 3,330/8$ ); Liprin- $\alpha$ 3 (<sup>+/+</sup>,  $n = 973/3$ ; <sup>-/-</sup>,  $n = 550/3$ ); Liprin- $\alpha$ 2 (<sup>+/+</sup>,  $n = 472/3$ ; <sup>-/-</sup>,  $n = 410/3$ ); Munc-13 (<sup>+/+</sup>,  $n = 599/3$ ; <sup>-/-</sup>,  $n = 556/3$ ); ELKS2 (<sup>+/+</sup>,  $n = 559/3$ ; <sup>-/-</sup>,  $n = 605/3$ ); RIM1 (<sup>+/+</sup>,  $n = 517/3$ ; <sup>-/-</sup>,  $n = 360/3$ ); RIM-BP2 (<sup>+/+</sup>,  $n = 394/3$ ; <sup>-/-</sup>,  $n = 499/3$ ); and Bassoon<sup>C</sup> (<sup>+/+</sup>,  $n = 533/3$ ; <sup>-/-</sup>,  $n = 425/3$ ). Statistical significance was determined by two-way ANOVA (genotype, test protein, and interaction significant at  $P \leq 0.001$ ) followed by Holm-Šidák posttests for multiple comparisons (reported in figure).
